# Supplementary material for: Mapping structure heterogeneities and visualizing moisture degradation of perovskite films with nano-focus WAXS
Source: PubMed Central journal article supplement (PMC9637205; doi:10.1038/s41467-022-34426-y), 2022-11-05
Supplement: 41467_2022_34426_MOESM3_ESM.pdf [file 41467_2022_34426_MOESM3_ESM.pdf]

**File name: Supplementary Data 1**

**Description:** CIF files either from the published reference or Crystallography Open Database/Cambridge Crystallographic Data Centre to simulate XRD patterns.
